# Supplementary material for: East Anglian early Neolithic monument burial linked to contemporary Megaliths
Source: PubMed Central journal article supplement (PMC6816495; doi:10.1080/03014460.2019.1623912), 2019-06-11
Supplement: IAHB_A_1623912_SM1111.pdf [file IAHB_A_1623912_SM1111.pdf]

**Supplementary Materials**

1 **S1: Archaeological Background**

2 *Craig Cessford*

3 The Trumpington Meadows site located southwest of Cambridge, UK, was excavated in  
4 2010-11 by the Cambridge Archaeological Unit in advance of development ((Evans et al.  
5 2018). Covering 6.1 hectares, archaeological features spanning the Neolithic to the Anglo-  
6 Saxon periods were investigated. Two heavily truncated contemporary adjacent Neolithic  
7 round barrows were present, the better preserved Monument I had a complex history with at  
8 least four burials and four phases of development that continued into the Early Bronze Age.  
9 The burials were probably placed within a timber chamber supported by earthen banks. The  
10 human remains comprised the skeletons of three adult males (Skeletons 1 [880], 2 [801] and 4  
11 [799]) plus a deposit of partially articulated and disarticulated bone (Skeleton 3 [800]) that  
12 may include both a fourth individual and parts of two of the other individuals. The sequence  
13 of interment is uncertain, although it has been argued that the most likely sequence from  
14 earliest to latest is Skeleton 1, Skeleton 2, Skeleton 3 and Skeleton 4. The radiocarbon  
15 determinations as quoted do not allow for the impact of either reservoir effects or bone  
16 turnover/remodelling. It is unlikely that either marine or freshwater fish formed a significant  
17 dietary component, so the impact of these can probably be discounted. Different skeletal  
18 elements were dated for the different individuals (Skeleton 1 tibia, Skeleton 2 femur, Skeleton  
19 3 rib, Skeleton 4 femur/tibia?), so the impact of bone turnover/remodelling would have varied  
20 and be greater for the long bones than the ribs. As all the individuals are adults, bone  
21 turnover/remodelling may have had an impact of making the radiocarbon determinations  
22 perhaps five to twenty years older than the actual time when the individuals died.

23 Analysis, which does not take into account either reservoir effects or bone  
24 turnover/remodelling but is still broadly robust, using Bcal (<https://bcal.sheffield.ac.uk>; (Buck  
25 et al. 1999)) indicates that the period of burial at Monument probably began between 3763-  
26 3662 cal BC) and ended between 3626-3484 cal BC (both 68% highest posterior density  
27 (HPD). It has been suggested that the burial chamber is unlikely to have been operational for  
28 more than 50 to 75 years ((Evans et al. 2018)p. 80), while analysis suggests that it was in use  
29 for at least 28 (95% HPD) or 46 (68% HPD) years. Concerning the two individuals with a  
30 full-sibling relationship there is a 96.5% probability that Skeleton 1 died before Skeleton 4  
31 and at a 68% HPD Skeleton 1 probably died 28 to 105 years before Skeleton 4, while at the  
32 95% HPD Skeleton 1 probably died between 23 and 293 years before Skeleton 4 (Bcal  
33 analysis)

34

35 **S2: Isotope Data Generation**

36 *Alice Rose, Tamsin O'Connell*

37 **Preparation of samples for Isotopic analysis**

38 Samples for carbon and nitrogen isotope analysis were prepared using a modified version of  
39 the Longin method (Longin 1971). Approximately 500mg of bone was cut using a hand-held

**Supplementary Materials**

40 dremel drill with a diamond tipped cutting wheel. The bone surface was then abraded using a  
41 precision sandblaster to remove surface dirt and contaminants. Samples were placed into pre-  
42 weighed glass test tubes and approximately 8ml of 0.5M aq. HCl was added. The samples  
43 were agitated twice a day and 0.5M aq. HCl replaced as appropriate until full  
44 demineralisation. When all samples were demineralised, samples were rinsed 3 times with  
45 distilled water, then the distilled water was removed and approximately 8ml of pH 3.0 water  
46 was added. The samples were then heated in an oven for 48hrs at 75°C until gelatinised. Once  
47 partially cooled, the supernatant liquor was filtered using Ezee filters, frozen, then lyophilised.

48 Analysis was carried out using a Costech automated elemental analyser coupled with a  
49 Thermo Finnigan Delta V mass spectrometer in the Godwin Laboratory, Department of Earth  
50 Sciences, Cambridge. All samples were run in triplicate (0.8mg ±0.1mg). Data Carbon and  
51 nitrogen stable isotope values are expressed as delta values (e.g.  $\delta^{13}\text{C}$ ) on the VPDB and AIR  
52 scales, for carbon and nitrogen respectively (Coplen 2011).

53 The ‘quality’ of the collagen was deemed acceptable if the C:N fell within the accepted range  
54 of 2.9 – 3.6 (DeNiro 1985). The preservation and purity of the collagen was deemed  
55 acceptable if the samples contained more than 1% collagen by mass, with a composition of  
56 more than 13%C and 4.8%N (Ambrose 1990). Any results outside of these values were  
57 rejected.

58

59 **S3: Ancient DNA Data Generation**

60 *Christiana Scheib*

61 **Sampling, decontamination and extraction**

62 Inside a class IIB hood in the dedicated aDNA facility of the University of Tartu Institute of  
63 Genomics, root portions of teeth were removed with a sterile drill wheel. Petrous was sampled  
64 with a 10mm core drill sterilised with bleach followed by distilled water and then ethanol  
65 rinse.

66 Root and petrous portions were briefly brushed to remove surface dirt, any varnish or lacquer,  
67 and microbial film with full strength household bleach (6% w/v NaOCl) using a disposable  
68 toothbrush that was soaked in 6% (w/v) bleach prior to use. They were then soaked in 6%  
69 (w/v) bleach for 5 minutes. Samples were rinsed twice with 18.2 MΩcm H<sub>2</sub>O and soaked in  
70 70% (v/v) Ethanol for 2 minutes, transferred to a clean paper towel on a rack inside a class IIB  
71 hood with the UV light on and allowed to dry. They were weighed and transferred to PCR-  
72 clean 5 ml or 15 ml conical tubes (Eppendorf) for chemical extraction.

73 Inside a class IIB hood, per 100 mg of each sample, 2 ml of 0.5M EDTA Buffer pH 8.0  
74 (Fluka) and 50 µl of Proteinase K 10 mg/ml (Roche) was added. Tubes were rocked in an  
75 incubator for 72 hours at room temperature. Extracts were concentrated to 250 µl using  
76 Amplicon Ultra-15 concentrators with a 30 kDa filter (Millipore).

77 Samples were purified according to manufacturer’s instructions using buffers from the  
78 Minelute™ PCR Purification Kit (Qiagen) with the following changes: 1) the use of High-  
79 Volume spin columns (Roche); 2) 10X PB buffer instead of 5X; and 3) samples incubated

**Supplementary Materials**

80 with EB buffer (Qiagen) at 37C for 10 minutes prior to elution. The columns were transferred  
81 to clean, labelled, 1.5ml Eppendorf tubes. One hundred microlitres EB buffer is added to the  
82 membrane and centrifuged at 13,000 rpm for two minutes after the 10-minute incubation and  
83 stored at -20 C. Only one extraction was performed per sample for screening and 30µl used  
84 for libraries.

85 **Library amplification**

86 Library preparation was conducted using a protocol modified from the manufacturer's  
87 instructions included in the NEBNext® Library Preparation Kit for 454 (E6070S, New  
88 England Biolabs, Ipswich, MA) as detailed in (Meyer & Kircher 2010). DNA was not  
89 fragmented and reactions were scaled to half volume, adaptors were made as described in  
90 (Meyer & Kircher 2010) and used in a final concentration of 2.5µM each. DNA was purified  
91 on MinElute columns (Qiagen). Libraries were amplified using the following PCR set up:  
92 50µl DNA library, 1X PCR buffer, 2.5mM MgCl<sub>2</sub>, 1 mg/ml BSA, 0.2µM inPE1.0, 0.2mM  
93 dNTP each, 0.1U/µl HGS Taq Diamond and 0.2µM indexing primer. Cycling conditions  
94 were: 5' at 94C, followed by 18 cycles of 30 seconds each at 94C, 60C, and 68C, with a final  
95 extension of 7 minutes at 72C. Amplified products were purified using MinElute columns and  
96 eluted in 35 µl EB (Qiagen). Three verification steps were implemented to make sure library  
97 preparation was successful and to measure the concentration of dsDNA/sequencing libraries –  
98 fluorometric quantitation (Qubit, Thermo Fisher Scientific), parallel capillary electrophoresis  
99 (Fragment Analyser, Advanced Analytical) and qPCR.

100 **S4: Ancient DNA Data Analysis**

101 *Christiana Scheib, Ruoyun Hui, Toomas Kivisild, Eugenia D'Atanasio*

102 **Mapping and Genotyping**

103 The samples were shotgun-sequenced on the Illumina NextSeq500 using single-end 75 base  
104 pair kit. Before mapping, the sequences of adaptors and indexes and poly-G tails occurring  
105 due to the specifics of the NextSeq 500 technology were removed from the ends of DNA  
106 sequences using cutadapt 1.9 (Martin 2011). Sequences shorter than 30 bp were also removed  
107 with the same program to avoid random mapping of sequences from other species.

108 The sequence reads were mapped to reference sequence GRCh37 (hg19) using Burrows-  
109 Wheeler Aligner (BWA 0.7.12) (Li & Durbin 2009) command `aln` with seeding disabled.

110 After mapping, the sequences were converted to BAM format and only sequences that  
111 mapped to the human genome were kept with samtools 1.9 (Li et al. 2009). Next, multiple  
112 bams from the same individual, but different runs were merged using samtools merge, reads  
113 with mapping quality under 30 were filtered out and duplicates were removed with picard  
114 2.12 (<http://broadinstitute.github.io/picard/index.html>).

115 **aDNA Authentication**

116 As a result of degradation over time, aDNA can be distinguished from modern DNA by  
117 certain characteristics: short fragments and a high frequency of C > T substitutions at the 5'

**Supplementary Materials**

118 ends of sequences due to cytosine deamination. The program mapDamage2.0 (Johnsson et al.  
119 2013) was used to estimate the frequency of 5' C > T transitions.

120 mtDNA contamination was estimated using the method from (Jones et al. 2017), which aligns  
121 the raw mtDNA reads to the RSRS (Behar et al. 2012), determines the haplotype using GATK  
122 pileup (McKenna et al. 2010) counts the number of heterozygous reads on haplotype-defining  
123 sites as well as adjacent sites and calculates a ratio that takes into account ancient DNA  
124 damage by excluding positions where a major allele is C or G and the minor is T or A  
125 respectively.

126 On average, the samples showed 48% - 52% C > T substitutions in the first five base pairs of  
127 the 5' ends (Table S7). The mtDNA contamination estimate for samples ranged from 0.4% to  
128 1.22% with an average of 0.92% (Table S2). The average of the two X chromosome  
129 contamination methods was between 0.19 and 2.27% with an average of 0.71% (Table S2).

130 **Calculating general statistics and determining genetic sex**

131 Samtools-1.9 (Li et al. 2009) option stats was used to determine the number of final reads,  
132 average read length, average coverage etc.

133 Genetic sex was calculated using the freely available python script from (Skoglund et al.  
134 2013), which estimates the fraction of reads with mapping quality > 30 mapping to Y  
135 chromosome out of all reads mapping to either X or Y chromosome. Genetic sexing  
136 confirmed morphological sex estimates for both individuals.

137 **Variant calling**

138 Variants were called in two ways, 1) for PCA and F statistics, pseudo-haploid genotypes were  
139 called with ANGSD (Korneliussen et al. 2014) command `-doHaploCall 1`, sampling a random  
140 base for the positions that are present in the 1.24 million SNPs present in comparative  
141 datasets; 2) for imputation, genotype likelihoods of 2.8 million SNPs with a minor allele count  
142  $\geq 5$  in the 1000 Genomes Project Phase 3 (1KG) were called using the ATLAS pipeline  
143 (Link et al. 2017), in which the base quality was recalibrated according to post-mortem  
144 damage pattern estimated from heterozygous reads on chromosome X.

145 **Global Imputation**

146 The genotypes were first estimated with BEAGLE 4.1 (Browning & Browning 2007) from  
147 genotype likelihoods produced by ATLAS (Link et al. 2017) in Beagle -gl mode, followed by  
148 imputation in Beagle -gt mode with BEAGLE 5 (Browning et al 2018) from sites where the GP  
149 of the most likely genotype reaches 0.99. To balance between imputation times and accuracy,  
150 we used 503 Europeans genomes in 1KG as the reference panel in Beagle -gl step, and 27,165  
151 genomes (except for chromosome 1, where the sample size is reduced to 22,691 due to a  
152 processing issue in the release) from the Haplotype Reference Consortium (HRC) (The  
153 Haplotype Reference Consortium, 2016) in the Beagle -gt step. A second GP filter (MAX(GP)  
154  $\geq 0.99$ ) was applied after the imputation. The imputation accuracy evaluated by running the  
155 same pipeline after down-sampling the sequencing reads of chromosome 20 of a Neolithic  
156 Hungarian genome (Gamba et al. 2014) to  $\sim 1.27X$  is shown in Table S11. For downstream

### Supplementary Materials

157 analyses using the imputed genome (runs of homozygosity, IBD segments, and tsinfer), we  
158 also filtered out variants with a minor allele frequency below 0.3 in the HRC panel.

#### 159 **Determining mtDNA haplogroups**

160 Raw reads were mapped to the revised Cambridge Reference Sequence (rCRS) (Andrews et  
161 al. 1999). Variants were called using Samtools 1.9 mpileup variant-only option (Li et al. 2009)  
162 and filtered using bcftools v 1.1 (Li et al. 2009). Haplogroups were assigned using Phylotree  
163 build 16 (van Oven & Kayser 2009) accessed at [www.phylotree.org](http://www.phylotree.org) and Haplogrep (Kloss-  
164 Brandstatter et al. 2011) accessed at <https://haplogrep.uibk.ac.at>.

#### 165 **Y chromosome variant calling and haplotyping**

166 Y chromosome variants were called as haploid and picking one allele at random (--doHaploCall  
167 1) in ANGSD-0.916 (Korneliussen et al. 2014) and filtered for regions that uniquely map to  
168 the Y chromosome, retaining 8.8 Mb when using short read sequencing technology (Karmin  
169 et al. 2015). Haplogroup assignments were made on the basis of in silico genotyping of the  
170 samples for 108,000 informative variants 1000 Genome Project populations (Poznik et al.  
171 2016) in 456 geographically diverse high-coverage Y chromosome sequences (Karmin et al.  
172 2015) and those annotated by <https://isogg.org/tree/> and <https://www.yfull.com/>. In  
173 haplogroup labelling we followed the nomenclature of Karmin et al. (2015) but also included  
174 the most recent isogg nomenclature when comparing to recent published work.

#### 175 **Principal component analysis**

176 Following pseudo-haploid genotype calling, we performed principal component analysis  
177 (PCA) on the merged dataset containing the Trumpington individuals, previously published  
178 ancient genomes from western Europe (Martiniano et al. 2016; Schiffels et al. 2016; Olalde et  
179 al. 2018; Brace et al. 2019, Sanchez-Quinto et al. 2019), and modern European genomes from  
180 the public Human Origins dataset (Lazaridis 2016) using EIGENSOFT smartpca (Patterson et  
181 al. 2006). 504,263 autosomal biallelic SNPs remained after the merge, and ancient samples  
182 were projected onto coordinates established by the Human Origins samples.

#### 183 **F statistics**

184 We merged the pseudo-haploid calls of the two Trumpington genomes and other newly  
185 published Neolithic British genomes (Brace et al 2019, Sanchez-Quinto et al 2019) with a  
186 compiled 1240k capture dataset of ancient and present-day individuals (v37.2) downloaded  
187 from [https://reich.hms.harvard.edu/downloadable-genotypes-present-day-and-ancient-dna-](https://reich.hms.harvard.edu/downloadable-genotypes-present-day-and-ancient-dna-data-compiled-published-papers)  
188 [data-compiled-published-papers](https://reich.hms.harvard.edu/downloadable-genotypes-present-day-and-ancient-dna-data-compiled-published-papers) in the EIGENSTRAT format. The haploid data were pseudo-  
189 diploidized and converted to plink format using ANGSD and merged in Plink-1.9 (Chang et  
190 al. 2015) with the available ancient data then converted to EIGENSTRAT format using  
191 EIGENSOFT-7.2.0 (Price et al. 2006; Patterson et al. 2006). F4 statistics were calculated  
192 using AdmixTools-5.1 (Patterson et al. 2012) with “Mbuti.DG” population as the outgroup.

#### 193 **Kinship analyses**

194 We searched for potential kinship between the two Trumpington individuals and 68 British  
195 Neolithic individuals whose genomes have been published. As values are affected by the  
196 reference population used, we restricted analysis to only Early Neolithic samples from the

**Supplementary Materials**

197 British Isles, excluding samples whose 95% confidence interval of C14 date falls more recent  
198 than 4,500 BP (Olalde et al 2018, Brace et al 2019, Sanchez-Quinto et al. 2019). Pseudo-  
199 haploid calls at a total of 1,233,013 SNPs of the ‘1240k capture’ produced in ANGSD were  
200 converted to .tped format which was used as an input for kinship analyses with READ (Kuhn  
201 et al. 2018). Merged bam files were used in the case of multiple runs per sample. Results are  
202 reported for relationships between the TRM10 samples and the comparative individuals in  
203 Table S6.

204 The lengths of runs of homozygosity were estimated in PLINK (Chang et al. 2015) using  
205 parameter settings described previously (Gamba et al. 2014): --homozyg --homozyg-window-snp  
206 50 --homozyg-snp 50 --homozyg-kb 1600 --homozyg-window-het 1 --homozyg-window-threshold 0.05  
207 --homozyg-gap 100 --homozyg-density 50. The proportion of genome identical by descent was  
208 calculated in PLINK using the --genome function. The results of these analyses are reported in  
209 Tables S8 and S7, respectively.

210

**211 Phenotype Prediction**

212 *Eugenia D’Atanasio*

213 To predict eye, hair and skin colour of the two Neolithic individuals, we selected all 41  
214 variants from 19 genes in 9 autosomes in the HIRISPLEX-S system (Chaitanya et al. 2018). We  
215 analysed a total of 10 regions ranging from 1.5 Mb to 6 Mb, obtained by adding 1 Mb at each  
216 side of each autosomal segment delimited by HIRISPLEX-S variants. The three genes on  
217 chromosome 15 have been analysed in two different regions (OCA2-HERC2 region and  
218 SLC24A5 region) because the distance between the two nearest SNPs of the two segments  
219 was greater than 20 Mb. For each of the 10 regions, we extracted the variants present in a  
220 modern reference panel composed of all the samples in the 1000 Genomes Phase 3 (1000  
221 Genomes Project Consortium et al. 2015). We extracted only the biallelic variant sites with a  
222 minor allele frequency (MAF) above 0.1%, using VCFtools and bcftools (Li 2012). Using  
223 this approach, we excluded only two variants (one SNP and one indel) of the HIRISPLEX-S set.  
224 The final list of variant sites was obtained by manipulating the VCFs with PLINK 1.9 (Chang  
225 et al. 2015). The local imputation was performed using the same pipeline for the global  
226 imputation, with some differences. All 2,504 genomes from the 1000 Genomes Project have  
227 been used as reference panel at the first Beagle step (-gl), while the HRC reference panel (>  
228 30,000 samples from worldwide cohorts, including the 1000 Genomes Project) was chosen for  
229 the Beagle -gt step. After imputation we applied a second GP filter, setting 0.85 as the  
230 threshold (Gamba et al. 2014).

231 The phenotype prediction was performed using the HIRISPLEX-S webtool  
232 (<https://hirisplex.erasmusmc.nl/>) (Walsh et al. 2014; Walsh et al. 2017), recoding and  
233 formatting the genotype information using PLINK 1.9 and R (R Core Team 2018). The  
234 missing genotypes were coded as “NA”.

235 The same pipeline was used to extract the allele information for other five variants: one SNP  
236 responsible for the lactase persistence in the European populations (rs4988235 in *MCM6*),  
237 three SNPs involved in the protection against leprosy (rs5743618 and rs4833095 in *TLR1* and

**Supplementary Materials**

238 rs3135388 in *HLA*) and one 32bp deletion responsible of the HIV resistance (rs333 in *CCR5*).  
239 Since indels are not present in the HRC reference panel, we used the 1000 Genomes samples  
240 in the Beagle -gt step to impute the rs333 variant.

241 Concordance between global and local imputation is listed in Table S12.

242

243 **Modern Descendants Analysis**

244 *Anthony Wilder Wohns*

245 The program *tsinfer* seeks to infer sequences of trees representing the complete gene  
246 genealogy of a sample using a two-step process: first, the ancestral haplotypes which  
247 contributed material to the samples are estimated using heuristic methods. Second, a Li and  
248 Stephens copying process is employed to show how sampled genomes copy genetic material  
249 from ancestral haplotypes. The analysis conducted in this work augments tree sequences  
250 generated from the 1000 Genomes Project (1KGP) (1000 Genomes Project Consortium et al.  
251 2015) and Simons Genome Diversity Panel (SGDP) (Mallick et al. 2016) datasets with the  
252 phased and imputed genomes of the two Trumpington individuals. The four chromosomes of  
253 the Trumpington individuals are inserted at the lowest level of the copying process, allowing  
254 samples in the 1KGP and SGDP to directly copy from the ancient individuals. See (Kelleher  
255 et al. 2018) for a full description of *tsinfer* and the copying process.

256 To augment the previously built tree sequences, it was necessary to find the overlap between  
257 the ancient chromosomes and modern genetic material. The imputed ancient samples included  
258 64.2% of the 1KGP sites, leaving an overlap of 24,570,629 sites for analysis. In the SGDP  
259 dataset 81.4% of sites overlapped, leaving 12,374,480 sites for analysis. After the non-  
260 overlapping sites were pruned from the dataset, we augmented the ancestral tree sequence of  
261 each 1KGP and SGDP chromosome with the ancient samples and then matched the modern  
262 samples to the ancestral tree sequences.

263 It is important to note that this copying process does not necessarily mean that the  
264 Trumpington individuals were direct genetic ancestors of the modern samples. Instead, it  
265 indicates that modern samples descend from individuals genetically indistinguishable from the  
266 Trumpington individuals over some parts of their genome.

267 The resulting tree sequences contain considerable detail about the ancestry of the ancient and  
268 modern samples at every site included in the analysis. To gain a high-level understanding of  
269 the genomic legacy of the Trumpington individuals we computed the genomic descent  
270 statistic, described in the next section.

271 The code implementing this analysis can be found at [https://github.com/awohns/neolithic-](https://github.com/awohns/neolithic-tsinfer)  
272 [tsinfer](https://github.com/awohns/neolithic-tsinfer).

273 **Genomic Descent Statistic:**

274 We define the genomic descent statistic quantifying the relative proportion of genetic material  
275 in each population which copies from an ancestral node  $u$ .

Supplementary Materials

276 Let  $R$  be a list of  $k$  sets of nodes. In our application,  $R$  is a list of the populations in the 1KGP  
277 or SGDP, with set  $R_k$  containing the samples in population  $k$ . For node  $i$  in reference set  $R_k$ ,  
278 define  $A_{i,u}^c$  as the total span of node  $i$  which copies from node  $u$  on chromosome  $c$ . The  
279 statistic is averaged over the portion of genome where the node is ancestral to *any* sample  
280 from the sets in  $R$ ,  $A_u^c$ . Finally, it is normalized by the size of reference set,  $|R_k|$ . Thus, the  
281 genomic descent statistic of node  $u$  in reference set  $k$  on chromosome  $c$  is:

282

$$283 \quad D_{c,R_k}(u) = \frac{\sum_{i \in R_k} A_{i,u}^c}{A_u^c * |R_k|} \text{ (Equation 1)}$$

284

285 To combine information from the autosomes for a given population, the total genomic descent  
286 statistic is calculated by adjusting the value of Equation 1 for each chromosome by the ratio of  
287 the size of each chromosome,  $L_c$ , to the total genome length,  $L_g$ :

288

$$289 \quad D_{g,R_k}(u) = \frac{\sum_{c=1}^{22} L_c D_{c,R_k}(u)}{L_g} \text{ (Equation 2)}$$

290

291 The height of the stacked bars in Figure 2B reflects the total genomic descent statistic for each  
292 population (the value of Equation 2). The relative size of each coloured section of the stacked  
293 bars in Figure 2B reflects the value of Equation 1. Thus, while the total height represents the  
294 genomic inheritance from the Trumpington haplotypes, the relative size of coloured regions  
295 within the bar shows the contribution from each chromosome *relative to the length of that*  
296 *chromosome*. In other words, long chromosomes such as chromosome 1 will not necessarily  
297 show a greater relative contribution than smaller chromosomes. This has been done to  
298 highlight any differences between chromosomes in terms of their proportion of genomic  
299 descent from Trumpington haplotypes. The evenness of the distribution of colours in the  
300 different bars indicates that most chromosomes support the same pattern of genomic descent.

301 Large deviations between chromosomes, for example in chromosome 22 in the SGDP Itelman  
302 population, may be due to phasing or imputation errors in ancient or SGDP samples (see  
303 Kelleher et al. 2018 for evidence of phasing errors in some 1KGP and SGDP samples).  
304 Variance due to small reference set size (for instance, only two Itelman individuals are  
305 included in the SGDP) or small chromosome size may also be potential explanatory factors.

306



**Supplementary Materials**

307

308

**References**

- 309 1000 Genomes Project Consortium et al. 2015. A global reference for human genetic  
310 variation. *Nature*. 526:68–74.
- 311 Ambrose SH. 1990. Preparation and characterization of bone and tooth collagen for isotopic  
312 analysis. *Journal of Archaeological Science*. 17:431–451.
- 313 Andrews RM, Kubacka I, Chinnery PF, Lightowiers RN, Turnbull DM, Howell N. 1999.  
314 Reanalysis and revision of the Cambridge reference sequence for human mitochondrial DNA.  
315 *Nat Genet*. 23:147.
- 316 Behar DM, van Oven M, Rosset S, Metspalu M, Loogväli E-L, Silva NM, Kivisild T, Torroni  
317 A, Villems R. 2012. A “Copernican” Reassessment of the Human Mitochondrial DNA Tree  
318 from its Root. *The American Journal of Human Genetics*. 90:675–684.
- 319 Browning SR, Browning BL. 2007. Rapid and accurate haplotype phasing and missing-data  
320 inference for whole-genome association studies by use of localized haplotype clustering.  
321 *American Journal of Human Genetics*. 81:1084–1097.
- 322 Buck C, Christen A, James GN. 1999. BCal: an on-line Bayesian radiocarbon calibration tool.  
323 *Internet Archaeology*. 65:808.
- 324 Chaitanya L, Breslin K, Zuñiga S, Wirken L, Pośpiech E, Kukla-Bartoszek M, Sijen T, Knijff  
325 P de, Liu F, Branicki W, et al. 2018. The HIRISplex-S system for eye, hair and skin colour  
326 prediction from DNA: Introduction and forensic developmental validation. *Forensic Science*  
327 *International: Genetics*. 35:123–135.
- 328 Chang CC, Chow CC, Tellier LC, Vattikuti S, Purcell SM, Lee JJ. 2015. Second-generation  
329 PLINK: rising to the challenge of larger and richer datasets. *Gigascience*. 4:7.
- 330 Coplen TB. 2011. Guidelines and recommended terms for expression of stable-isotope-ratio  
331 and gas-ratio measurement results. *Rapid Communications in Mass Spectrometry*. 25:2538–  
332 2560.
- 333 DeNiro MJ. 1985. Postmortem Preservation and Alteration of In vivo Bone-Collagen Isotope  
334 Ratios in Relation to Paleodietary Reconstruction. *Nature*. 317:806–809.
- 335 Evans C, Lucy S, Patten R. 2018. *Riversides: Neolithic Barrows, a Beaker Grave, Iron Age  
336 and Anglo-Saxon Burials and Settlement at Trumpington, Cambridge*. Cambridge: McDonald  
337 Institute for Archaeological Research.
- 338 Gamba C, Jones ER, Teasdale MD, McLaughlin RL, Gonzalez-Fortes G, Mattiangeli V, czki  
339 LASODO, aacute ri von IKO, Pap IO, Anders A, et al. 2014. Genome flux and stasis in a five  
340 millenium transect of European prehistory. *Nature Communications*. 5:1–9.
- 341 Johnsson H, Ginolhac A, Shubert M, Johnson PL, Orlando L. 2013. mapDamage2.0: fast  
342 approximate Bayesian estimates of ancient DNA damage parameters. *Bioinformatics*.

## East Anglian Early Neolithic monument burial linked to contemporary Megaliths –

### Supplementary Materials

- 343 29:1682–1684.
- 344 Jones ER, Zariņa G, Moiseyev V, Lightfoot E, Nigst PR, Manica A, Pinhasi R, Bradley DG.  
345 2017. The Neolithic Transition in the Baltic Was Not Driven by Admixture with Early  
346 European Farmers. *Curr Biol.* 27:576–582.
- 347 Karmin M, Saag L, Vicente M, Sayres MAW, Jarve M, Talas UG, Rootsi S, Ilumäe A-M,  
348 Maegi R, Mitt M, et al. 2015. A recent bottleneck of Y chromosome diversity coincides with a  
349 global change in culture. *Genome Research.* 25:459–466.
- 350 Kelleher J, Wong Y, Albers PK, Wohns AW, McVean G. 2018. Inferring the ancestry of  
351 everyone. *bioRxiv.*:458067.
- 352 Kloss-Brandstatter A, Pacher D, Schonherr S, Weissensteiner H, Binna R, Specht G,  
353 Kronenberg F. 2011. HaploGrep: a fast and reliable algorithm for automatic classification of  
354 mitochondrial DNA haplogroups. *Hum Mutat.* 32:25–32.
- 355 Korneliussen TS, Albrechtsen A, Nielsen R. 2014. ANGSD: Analysis of Next Generation  
356 Sequencing Data. *BMC Bioinformatics.* 15:356.
- 357 Kuhn JMM, Jakobsson M, Gunther T. 2018. Estimating genetic kin relationships in  
358 prehistoric populations. *PLoS ONE.* 13:e0195491.
- 359 Li H, Durbin R. 2009. Fast and accurate short read alignment with Burrows-Wheeler  
360 transform. *Bioinformatics.* 25:1754–1760.
- 361 Li H, Handsaker B, Wysoker A, Fennell T, Ruan J, Homer N, Marth G, Abecasis G, Durbin  
362 R, 1000 Genome Project Data Processing Subgroup. 2009. The Sequence Alignment/Map  
363 format and SAMtools. *Bioinformatics.* 25:2078–2079.
- 364 Li H. 2012. A statistical framework for SNP calling, mutation discovery, association mapping  
365 and population genetical parameter estimation from sequencing data. *arXiv.* q-bio.GN:2987–  
366 2993.
- 367 Link V, Kousathanas A, Veeramah K, Sell C, Scheu A, Wegmann D. 2017. ATLAS: Analysis  
368 Tools for Low-depth and Ancient Samples. *bioRxiv.*:105346.
- 369 Longin R. 1971. New method of collagen extraction for radiocarbon dating. *Nature.* 230:241–  
370 242.
- 371 Mallick S, Li H, Lipson M, Mathieson I, Gymrek M, Racimo F, Zhao M, Chennagiri N,  
372 Nordenfelt S, Tandon A, et al. 2016. The Simons Genome Diversity Project: 300 genomes  
373 from 142 diverse populations. *Nature.* 538:201–.
- 374 Martin M. 2011. Cutadapt removes adapter sequences from high-throughput sequencing  
375 reads. *EMBnetjournal.* 17:10–12.
- 376 McKenna A, Hanna M, Banks E, Sivachenko A, Cibulskis K, Kernytsky A, Garimella K,  
377 Altshuler D, Gabriel S, Daly M, DePristo MA. 2010. The Genome Analysis Toolkit: a  
378 MapReduce framework for analyzing next-generation DNA sequencing data. *Genome*

**Supplementary Materials**

- 379 Research. 20:1297–1303.
- 380 Meyer M, Kircher M. 2010. Illumina Sequencing Library Preparation for Highly Multiplexed  
381 Target Capture and Sequencing. Cold Spring Harbor Protocols. 2010:pdb.prot5448–  
382 pdb.prot5448.
- 383 Patterson N, Moorjani P, Luo Y, Mallick S, Rohland N, Zhan Y, Genschoreck T, Webster T,  
384 Reich D. 2012. Ancient Admixture in Human History. Genetics. 192:1065–.
- 385 Patterson N, Price AL, Reich D. 2006. Population structure and eigenanalysis. PLoS Genet.  
386 2:2074–2093.
- 387 Poznik GD, Xue Y, Mendez FL, Willems TF, Massaia A, Wilson Sayres MA, Ayub Q,  
388 McCarthy SA, Narechania A, Kashin S, et al. 2016. Punctuated bursts in human male  
389 demography inferred from 1,244 worldwide Y-chromosome sequences. Nat Genet. 48:593–  
390 599.
- 391 Price AL, Patterson NJ, Plenge RM, Weinblatt ME, Shadick NA, Reich D. 2006. Principal  
392 components analysis corrects for stratification in genome-wide association studies. Nat Genet.  
393 38:904–909.
- 394 R Core Team. 2018. R: A language and environment for statistical computing. Vienna,  
395 Austria. <http://www.R-project.org>.
- 396 Skoglund P, Storå J, Götherström A, Jakobsson M. 2013. Accurate sex identification of  
397 ancient human remains using DNA shotgun sequencing. Journal of Archaeological Science.  
398 40:4477–4482.
- 399 van Oven M, Kayser M. 2009. Updated comprehensive phylogenetic tree of global human  
400 mitochondrial DNA variation. Hum Mutat. 30:E386–E394.
- 401 Walsh S, Chaitanya L, Breslin K, Muralidharan C, Bronikowska A, Pośpiech E, Koller J,  
402 Kovatsi L, Wollstein A, Branicki W, et al. 2017. Global skin colour prediction from DNA.  
403 Hum Genet. 136:847–863.
- 404 Walsh S, Chaitanya L, Clarisse L, Wirken L, Draus-Barini J, Kovatsi L, Maeda H, Ishikawa  
405 T, Sijen T, de Knijff P, et al. 2014. Developmental validation of the HIrisPlex system: DNA-  
406 based eye and hair colour prediction for forensic and anthropological usage. Forensic Science  
407 International: Genetics. 9:150–161.
- 408
- 409

# East Anglian Early Neolithic monument burial linked to contemporary Megaliths –

## Supplementary Materials

410 **Figure S1.**

411

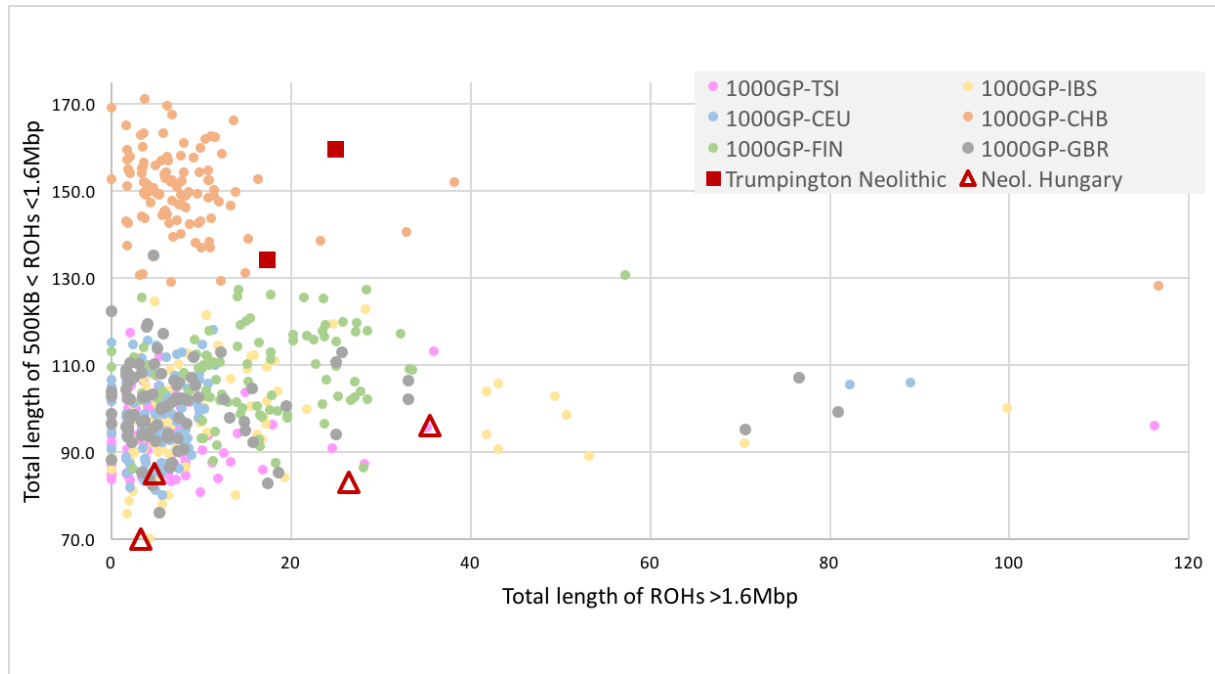

412

413

414 **Figure S2.**

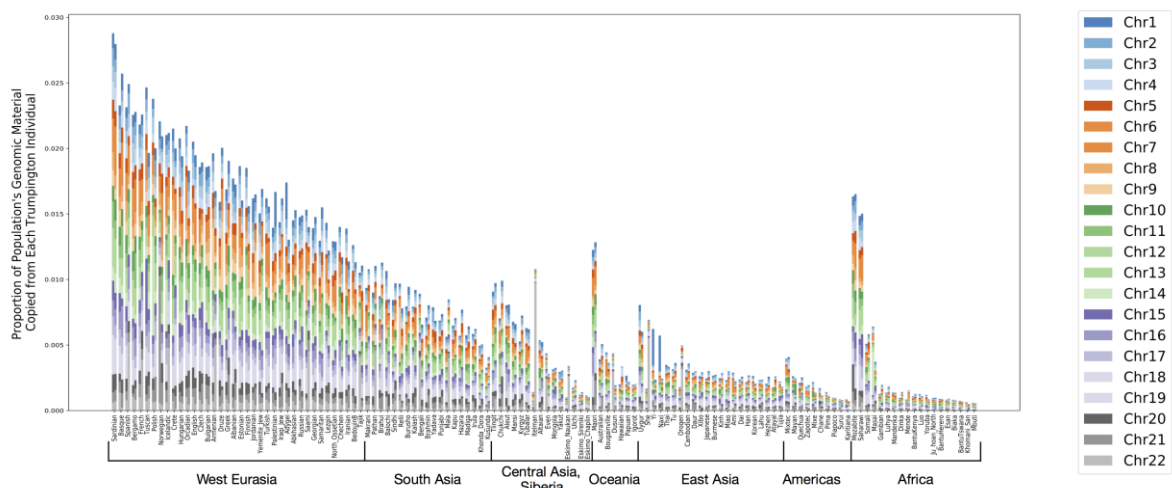

415

416 **Figure Captions:**

417 **1. Short vs. long runs of homozygosity (ROHs) in Neolithic and Present-day samples.**

418 The lengths of runs of homozygosity estimated in PLINK (Chang et al. 2015) using  
419 parameter settings described previously (Gamba et al. 2014). X axis is the number of  
420 total lengths of ROH over 1.6 megabase pairs, Y axis is the number of total lengths

**Supplementary Materials**

421 over 500 kilobase pairs but less than 1.6 megabase pairs. Ancient samples are plotted  
422 against comparative samples from the 1000 Genomes Project (1000 Genomes Project  
423 Consortium et al. 2015).

**2. Genomic descent from the Trumpington samples in the Simons Genome Diversity**

424 **Panel.** Bar height indicates the relative proportion of genomic material in the named  
425 population which is inferred to copy directly from the haplotypes present in Sk.4/799  
426 (left side of each bar) and Sk.1/880 (right side of each bar). Colours give the  
427 contribution from each chromosome, relative to chromosome size, to indicate if the  
428 pattern differs for different chromosomes. Populations are sorted by super population  
429 and decreasing values of the genomic descent statistic (averaged between Sk.4/799  
430 and Sk.1/880).  
431
